# Supplementary material for: Impact of Cu(ii) and Al(iii) on the conformational landscape of amyloidβ1-42
Source: Royal Society of Chemistry journal article supplement (doi:10.1039/d1cp01561c), 2021-01-01
Supplement: d1cp01561c1.pdf [file d1cp01561c1.pdf]

## **Electronic Supplementary Information**

### **Impact of Cu(II) and Al(III) on the conformational landscape of Amyloid $\beta_{1-42}$**

Lorena Roldán-Martín,<sup>a</sup> Francesca Peccati,<sup>a,b</sup> Giuseppe Sciortino,<sup>a,c</sup> Mariona Sodupe\*,<sup>a</sup> and Jean-Didier Maréchal\*,<sup>a</sup>

a. Departament de Química, Universitat Autònoma de Barcelona, 08193 Cerdanyola del Vallès, Spain. E-mail: [lorena.roldan@uab.cat](mailto:lorena.roldan@uab.cat), [mariona.sodupe@uab.cat](mailto:mariona.sodupe@uab.cat), [jeandidier.marechal@uab.cat](mailto:jeandidier.marechal@uab.cat)

b. CIC bioGUNE, Basque Research and Technology Alliance, BRTA, Bizkaia Technology Park, 48162 Derio, Spain

c. Institut of Chemical Research of Catalonia (ICIQ), Països Catalans, 16, 43007 Tarragona, Catalonia, Spain.

### ***Table of Contents***

|                                                                |            |
|----------------------------------------------------------------|------------|
| <b>1. Initial Conformation and PCA analysis .....</b>          | <b>S1</b>  |
| <b>2. Aluminium systems .....</b>                              | <b>S3</b>  |
| <b>3. Copper Systems .....</b>                                 | <b>S6</b>  |
| <b>4. Phe19 and Phe20 exposure in U-Shape structures .....</b> | <b>S10</b> |
| <b>5. Computational Information for Docking studies .....</b>  | <b>S12</b> |

## 1. Initial Conformation and PCA analysis

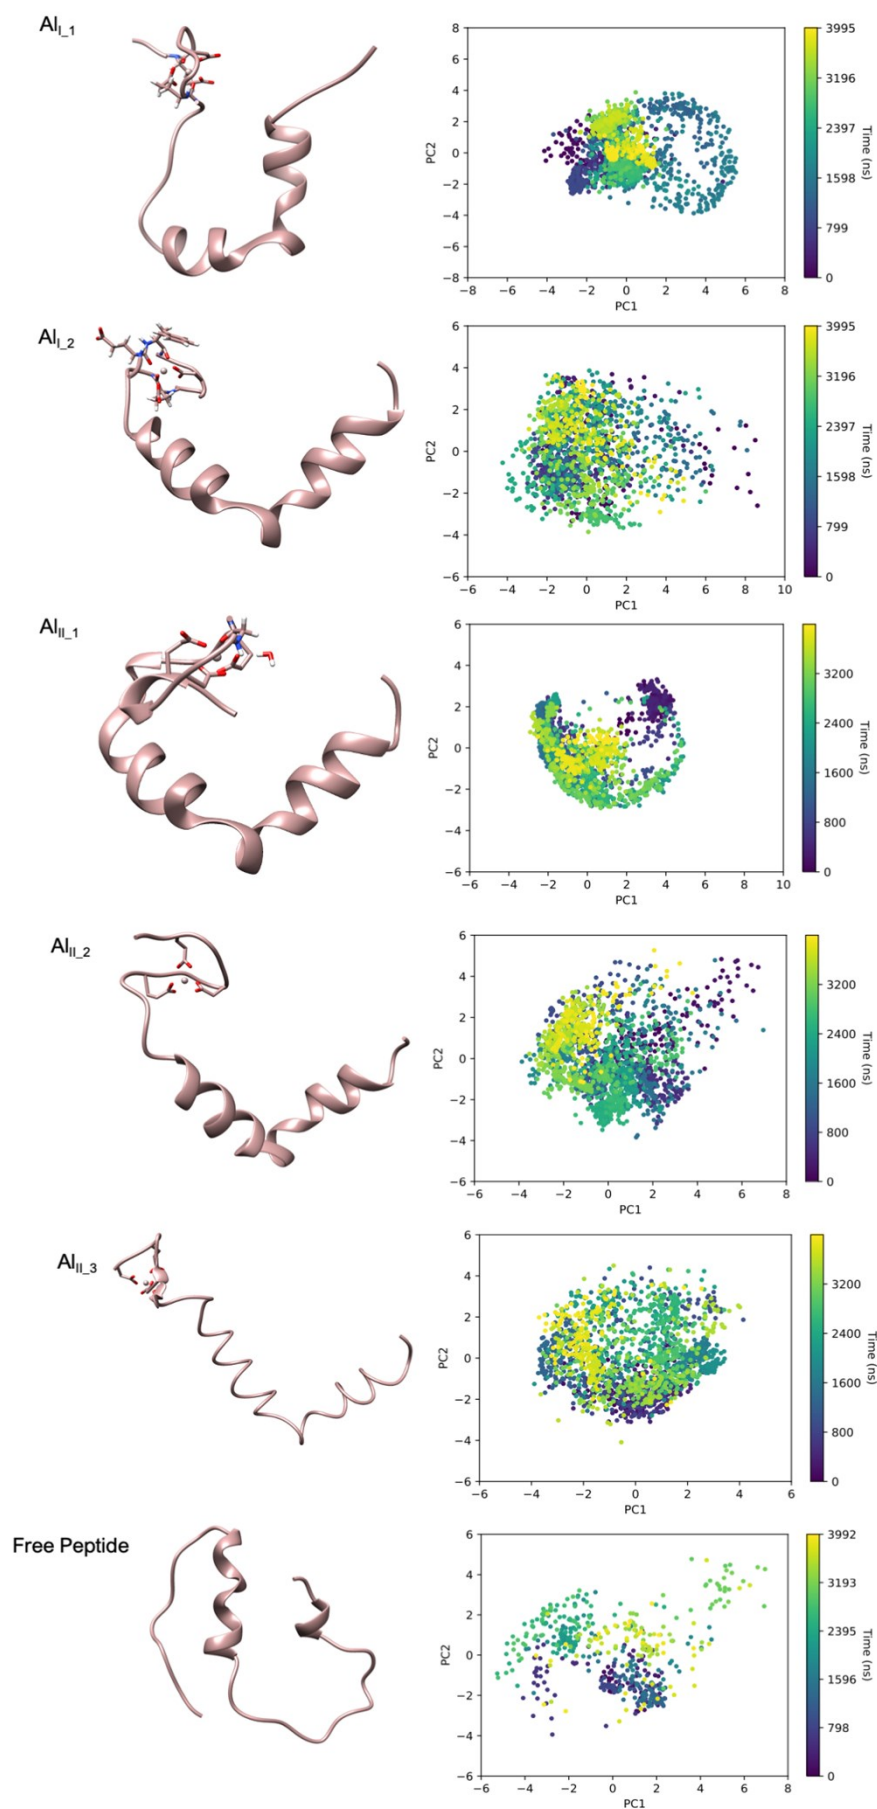

Figure S1. Initial conformation of each system and PCA analysis of the whole simulation.

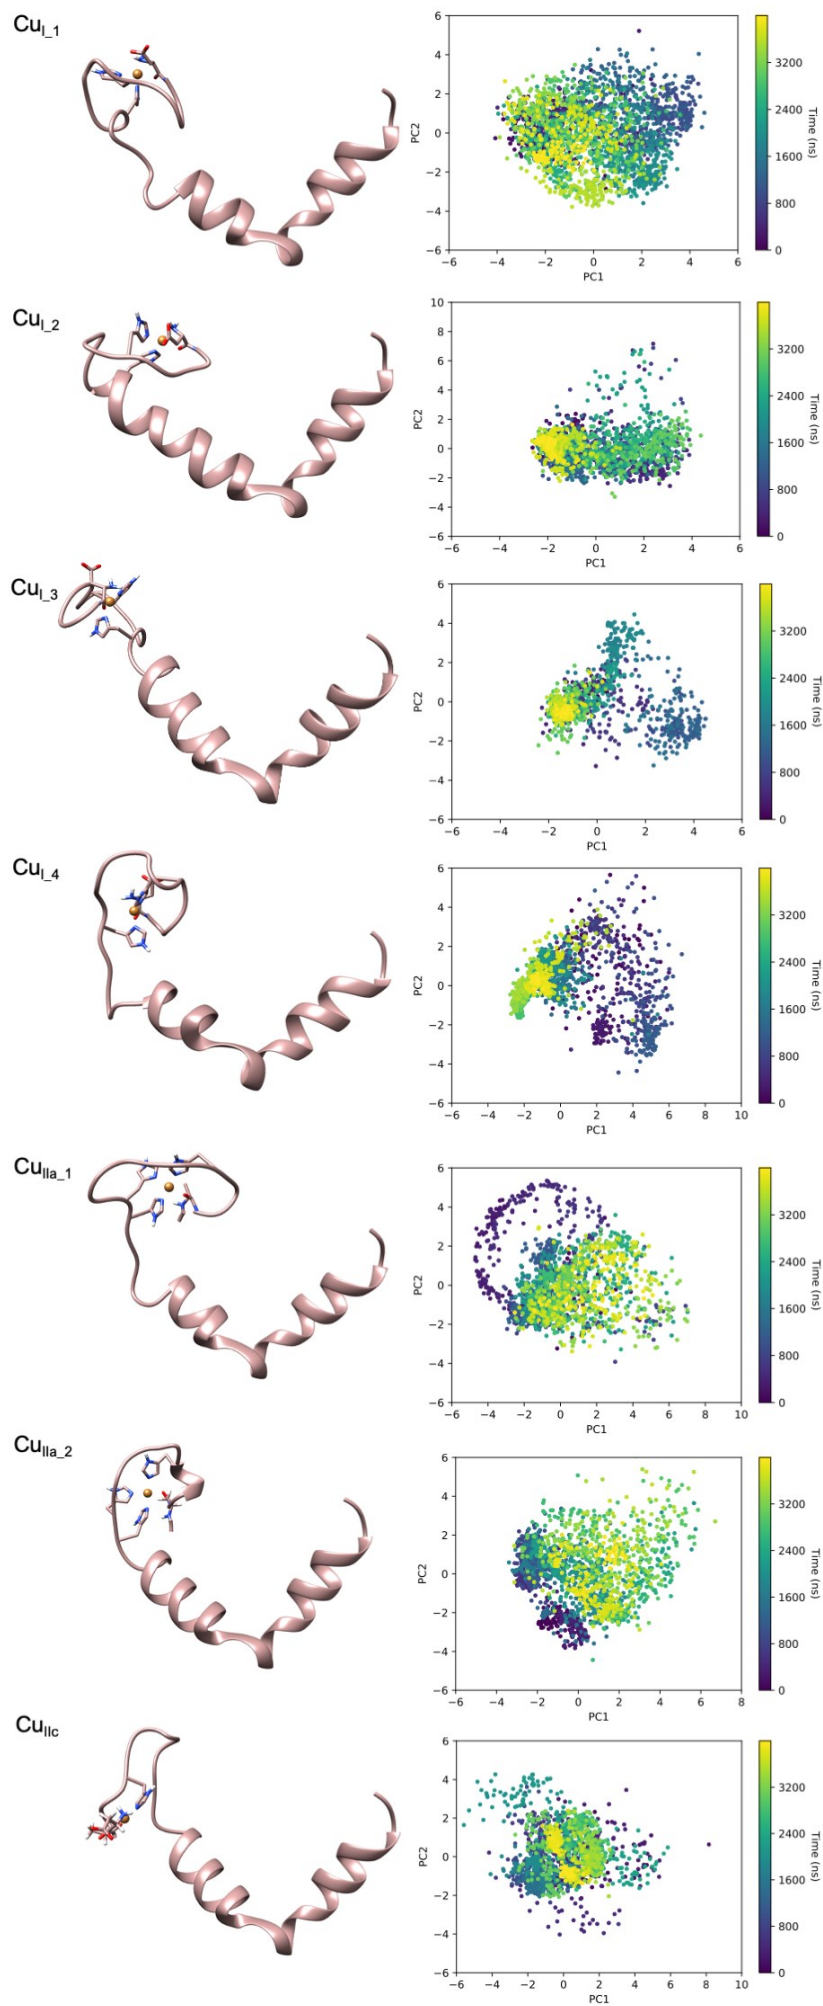

Figure S1. Continued.

## 2. Aluminium systems

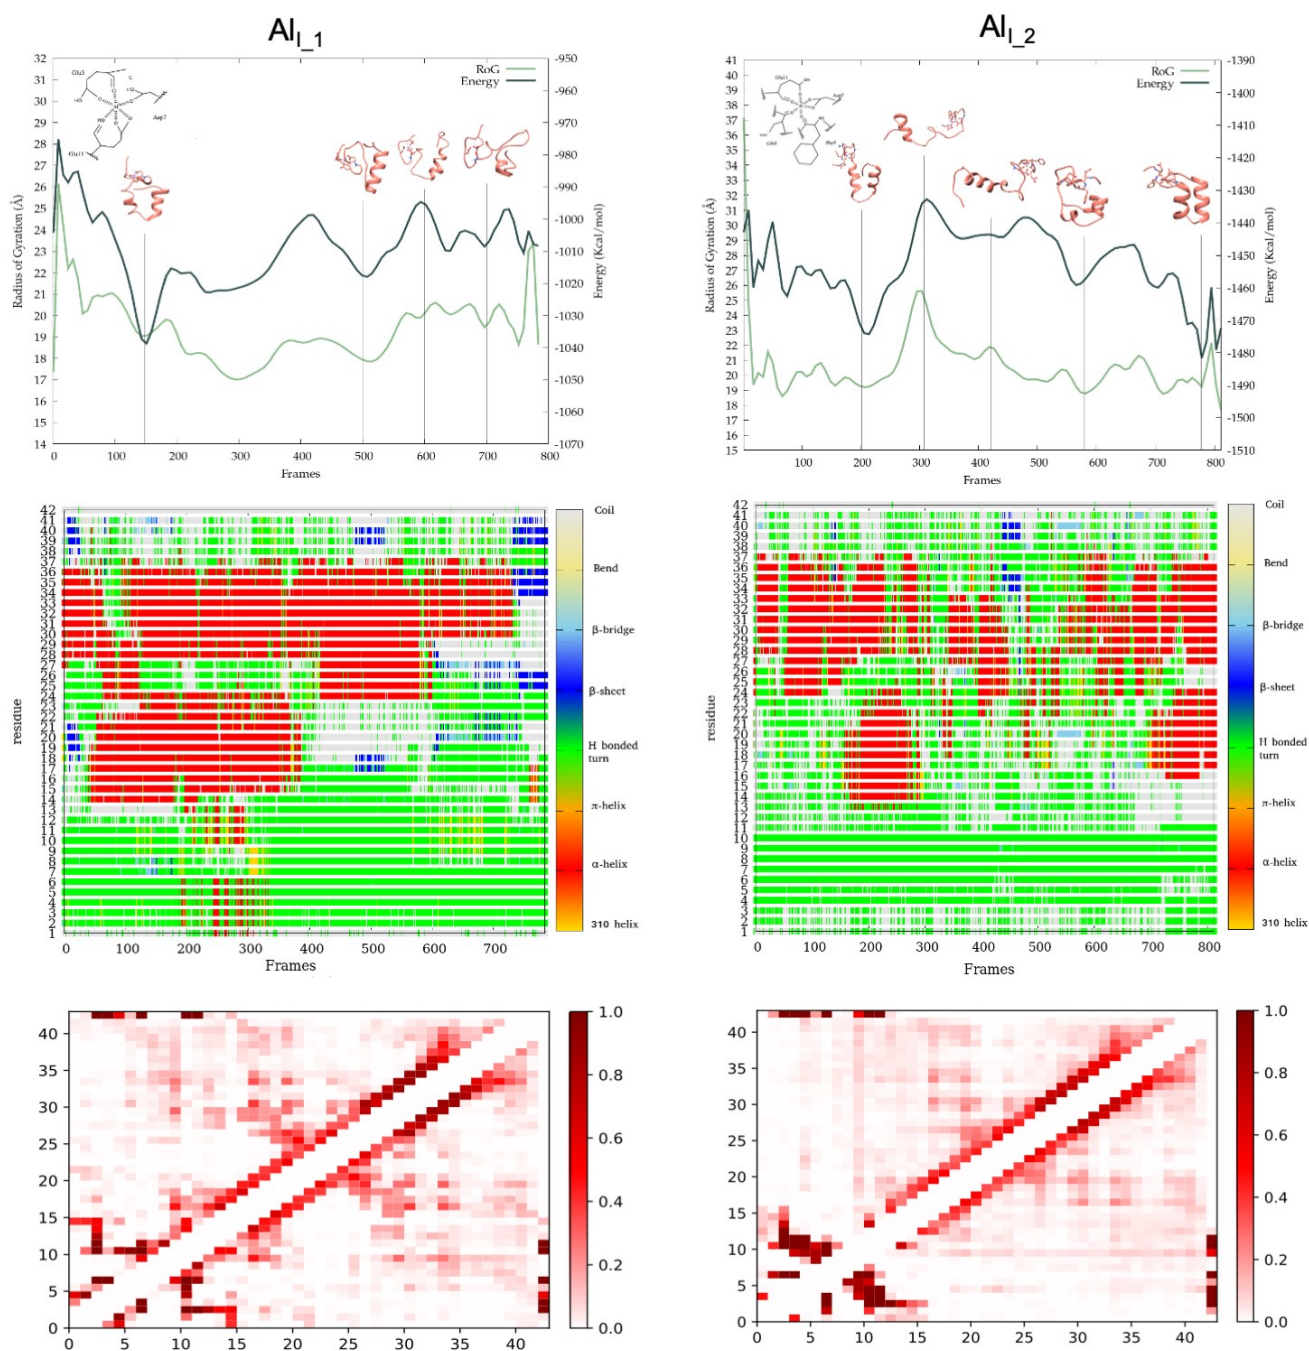

Figure S2. Energy profile with Radius of Gyration and representative frames, Timeline and Frequency Contact Map for Al(III) complexes and Free Peptide.



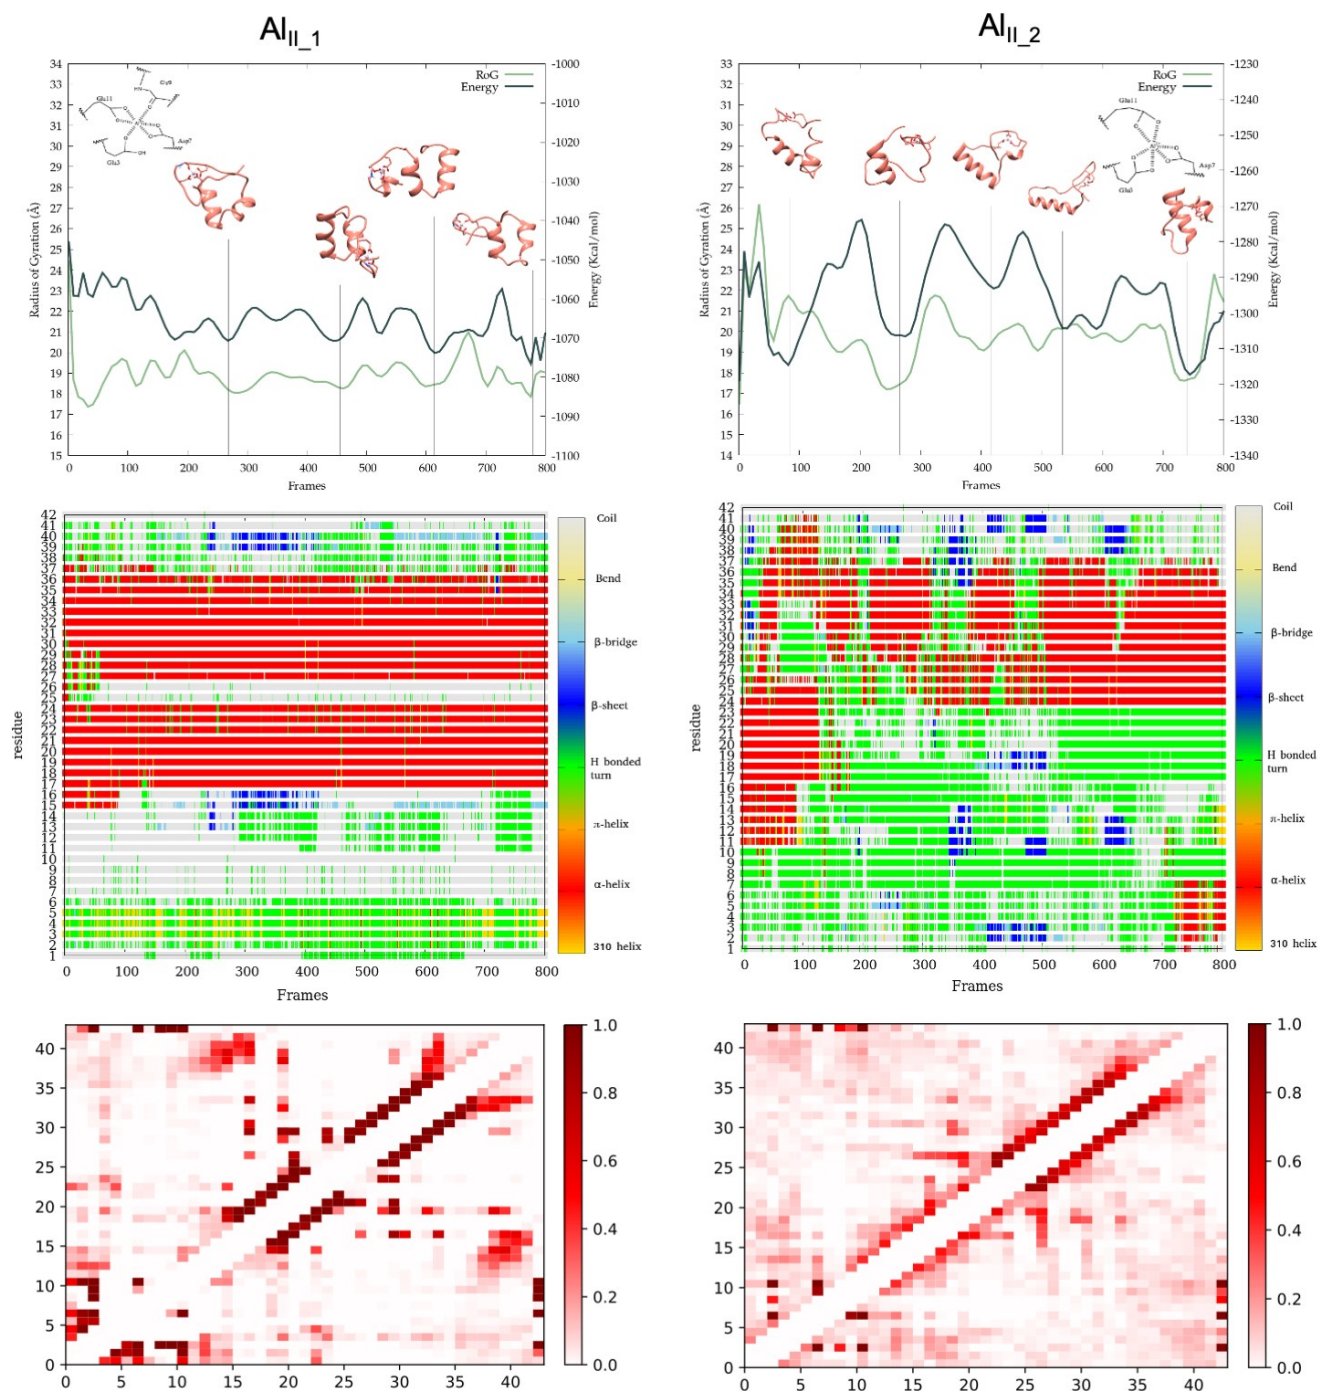

Figure S2. Continued.

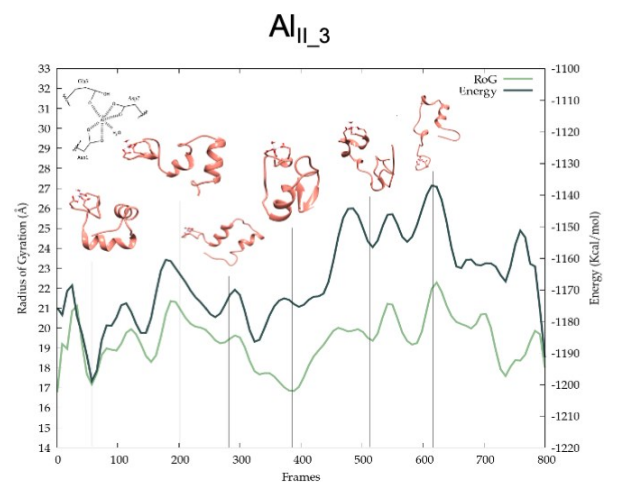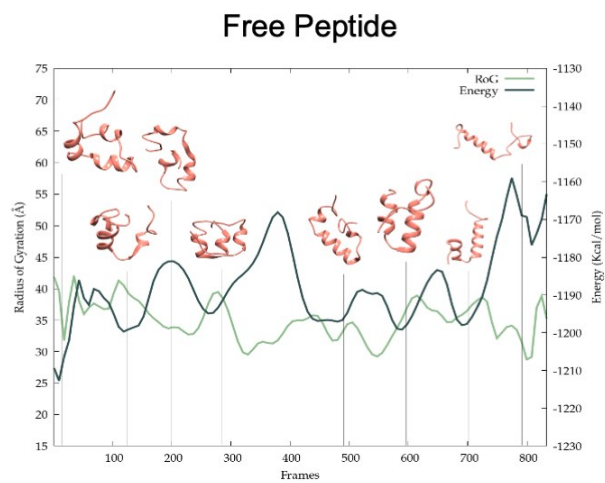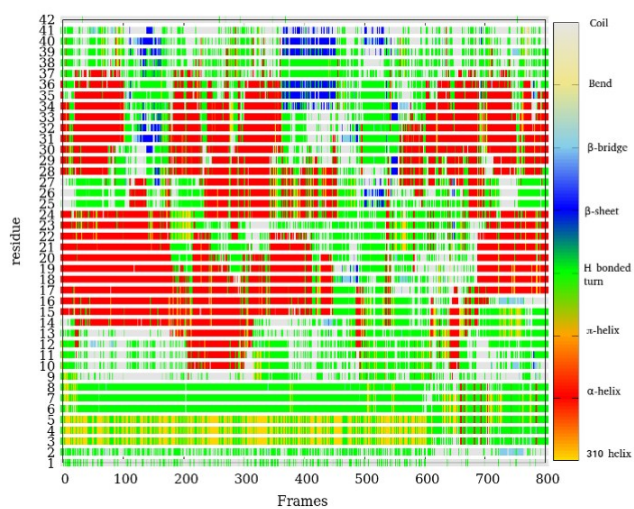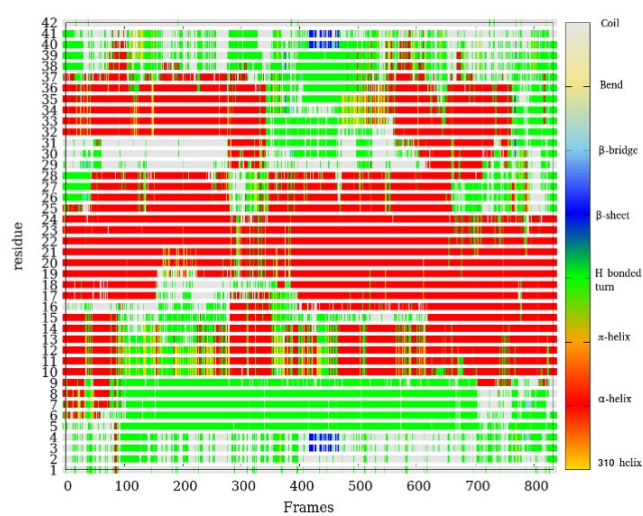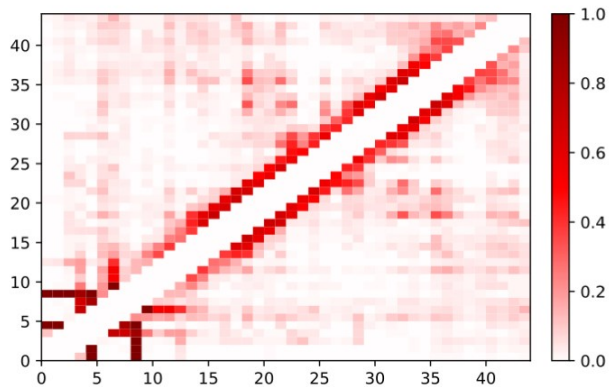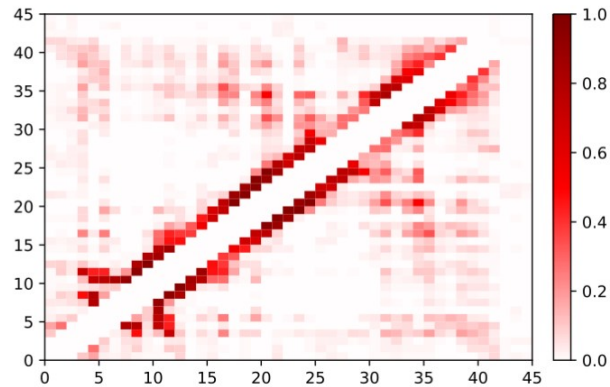

Figure S2. Continued.



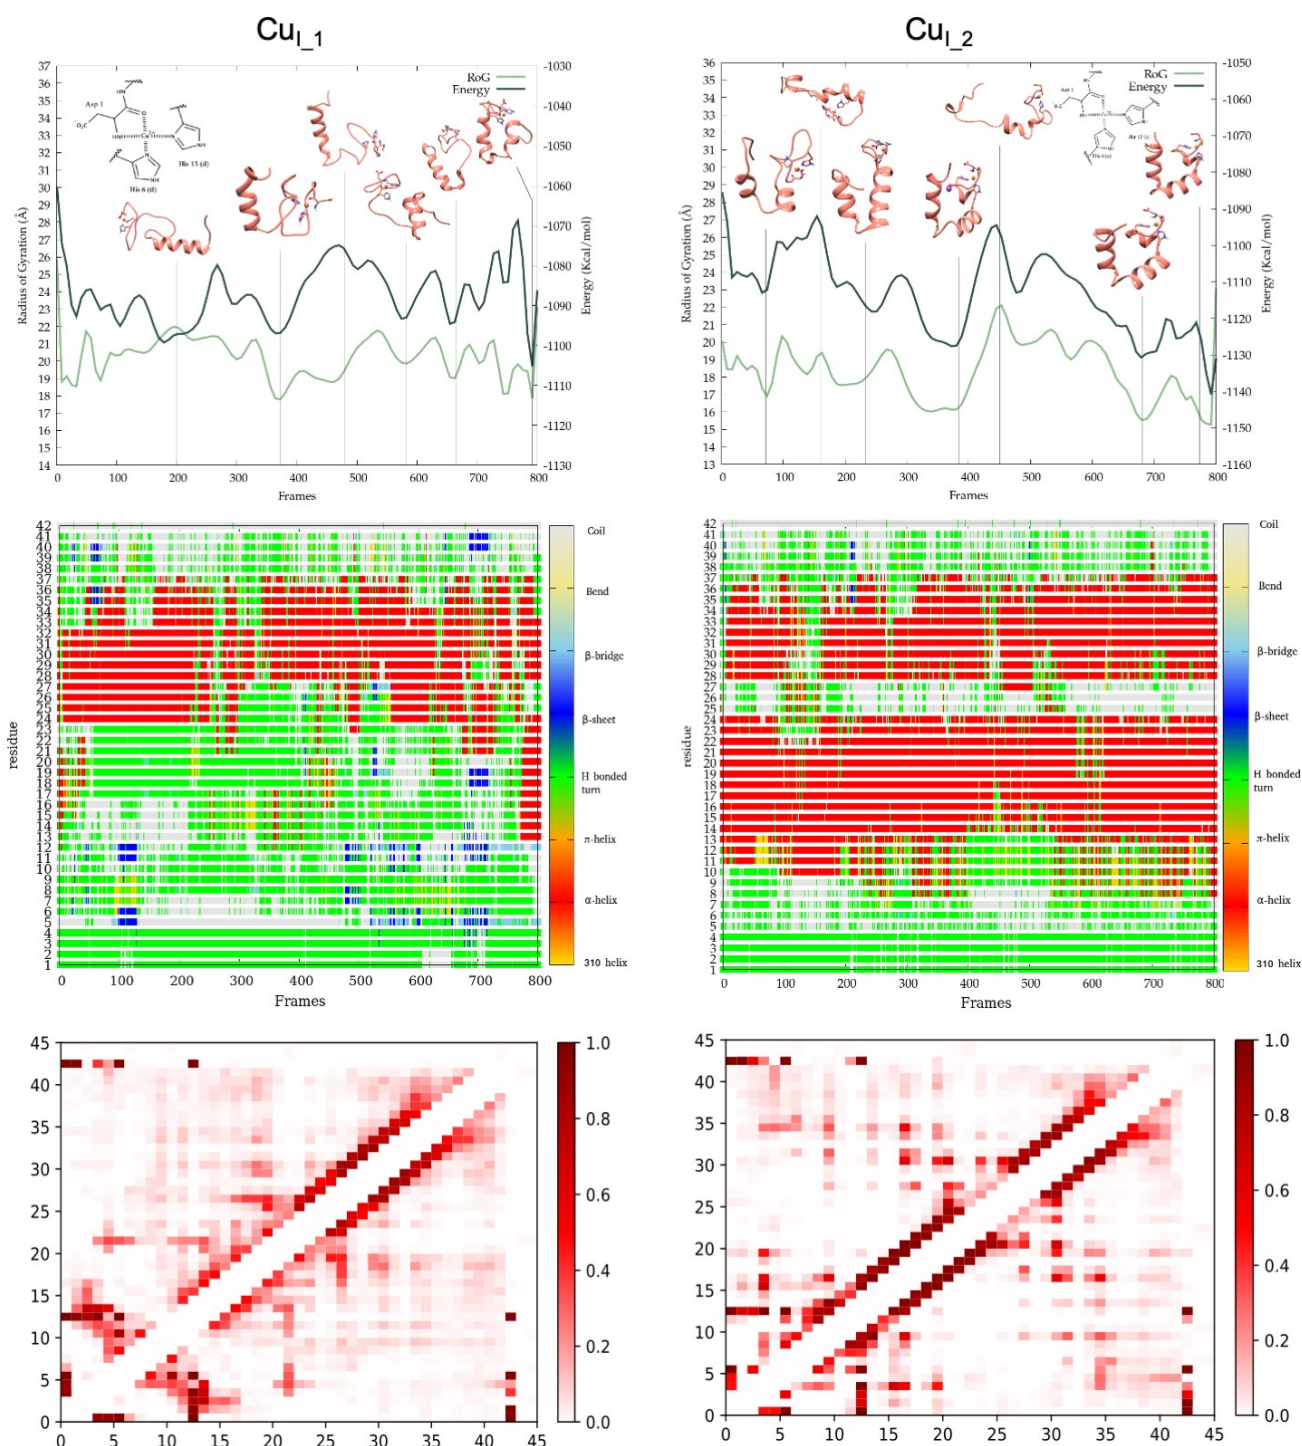

### 3. Copper Systems

Figure S3. Energy profile with Radius of Gyration and representative frames, Timeline and Frequency Contact Map for Cu(II) complexes.

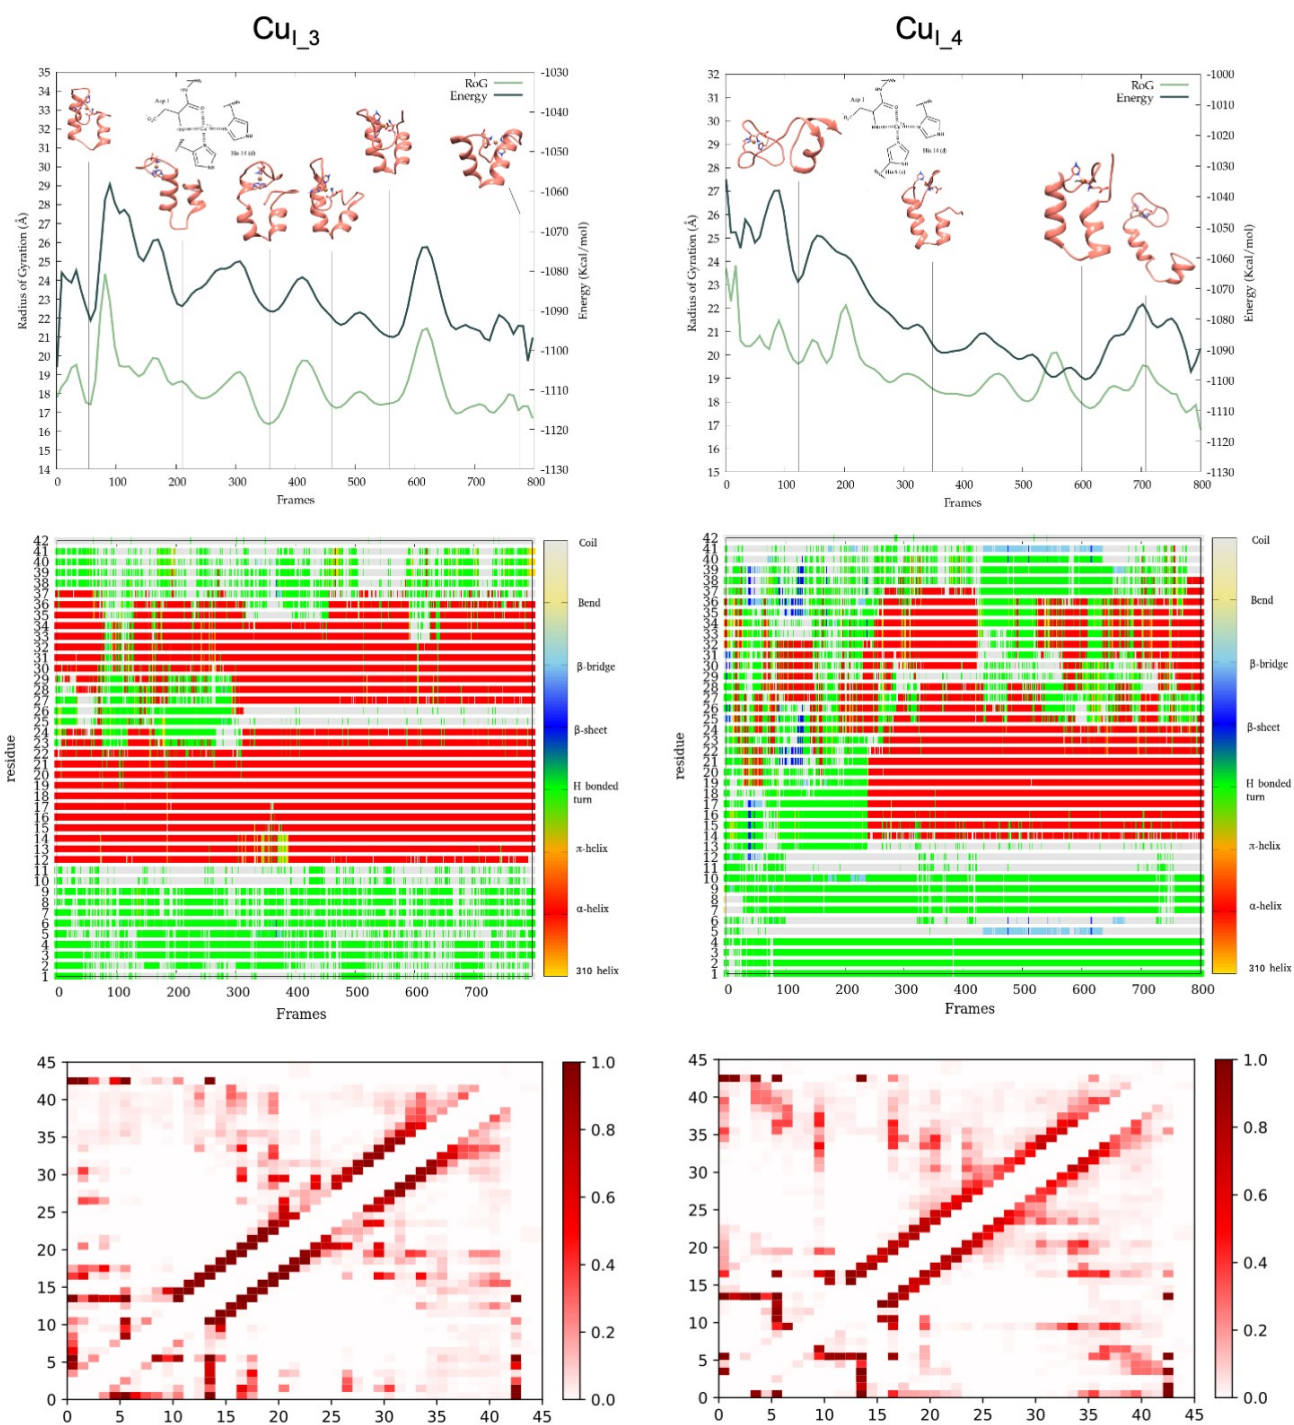

Figure S3. Continued.



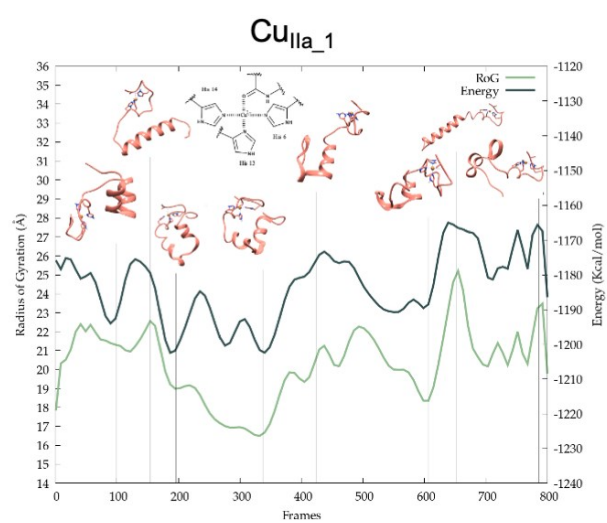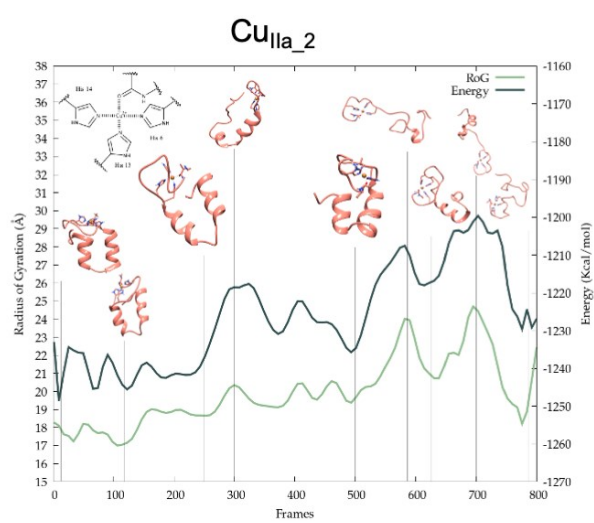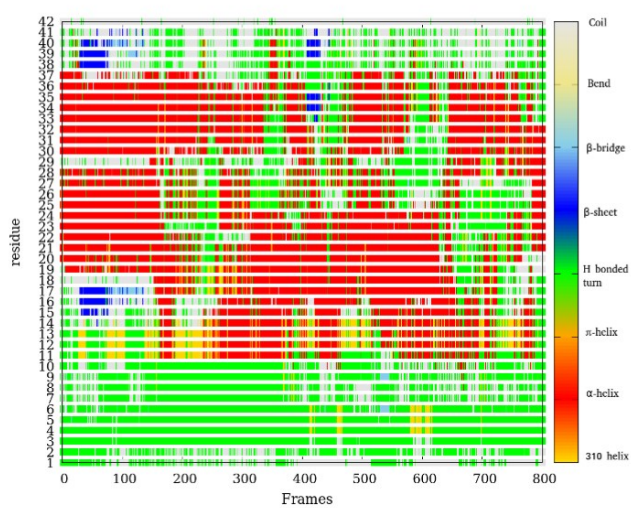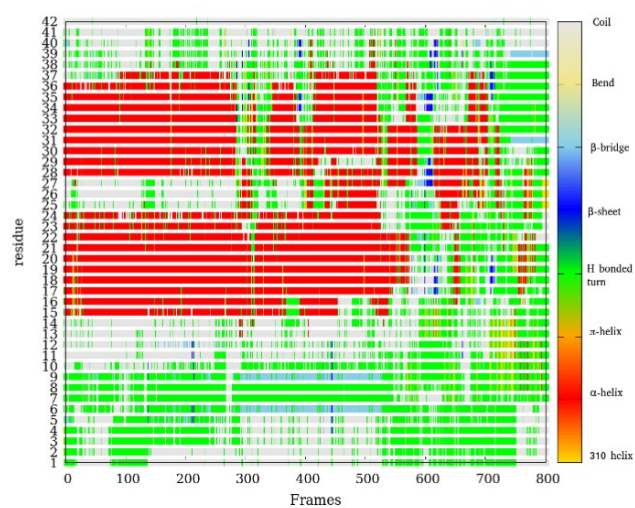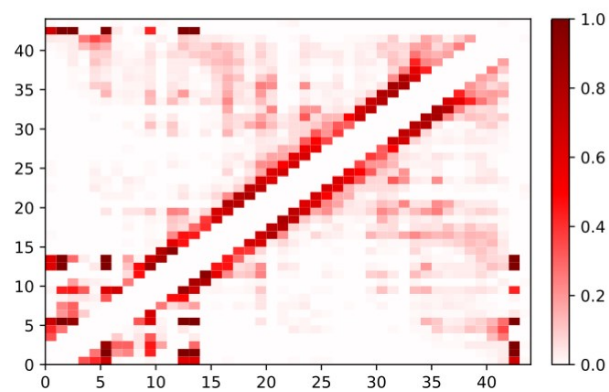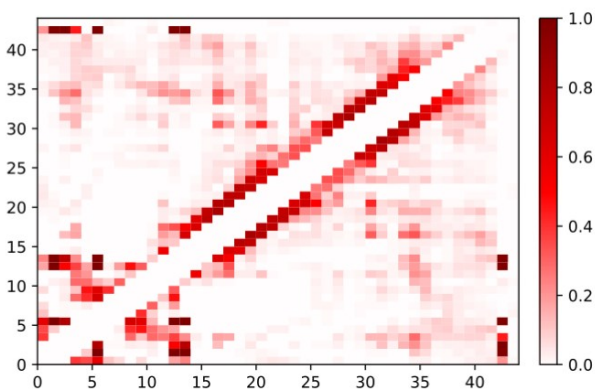

Figure S3. Continued.

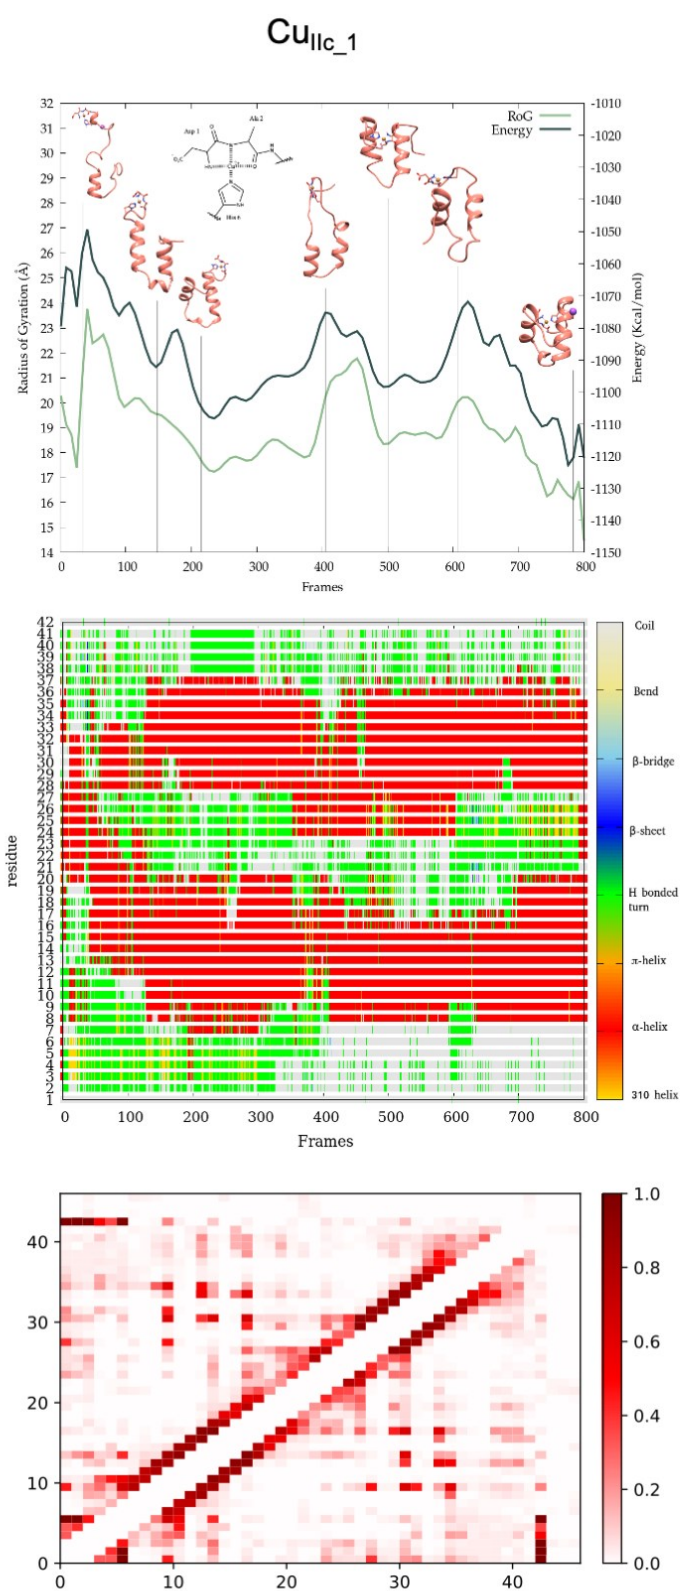

Figure S3. Continued.

#### 4. Phe19 and Phe20 exposure in U-Shape structures

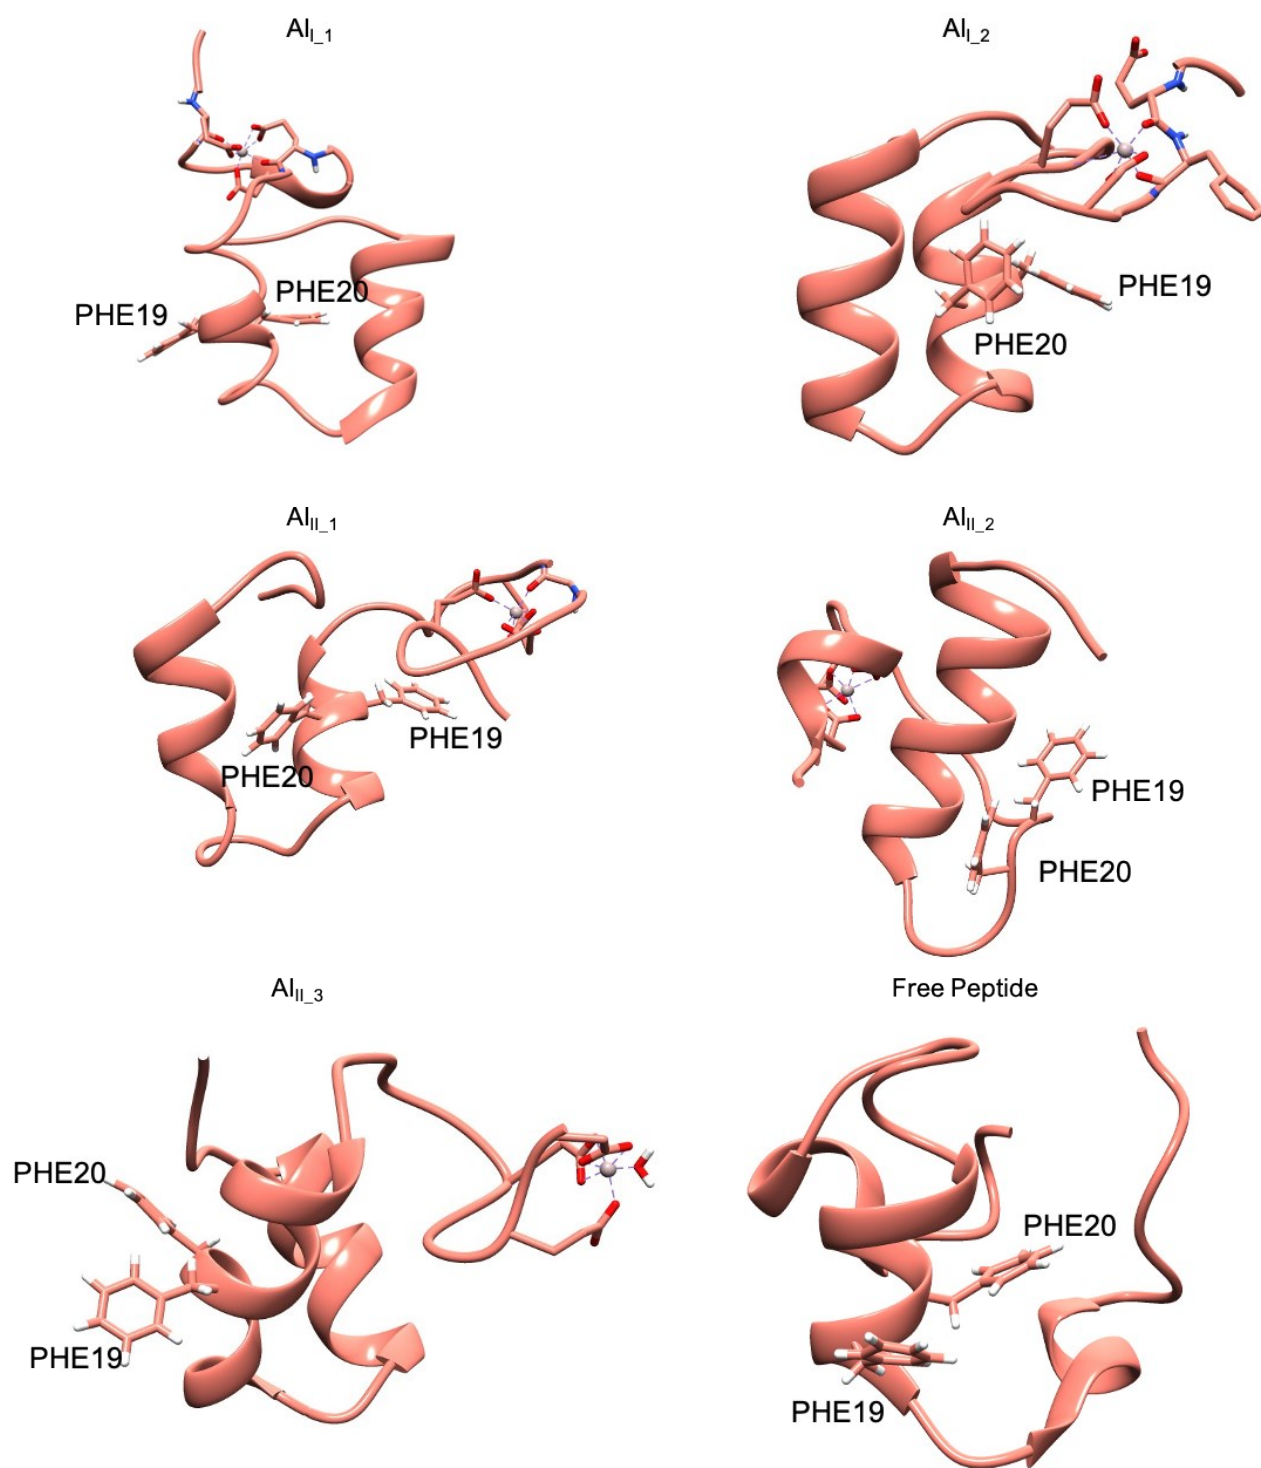

Figure S4.1. Exposure of residues Phe19 and Phe20 in the lowest energy well of Al(III)-Aβ complexes and free peptide.



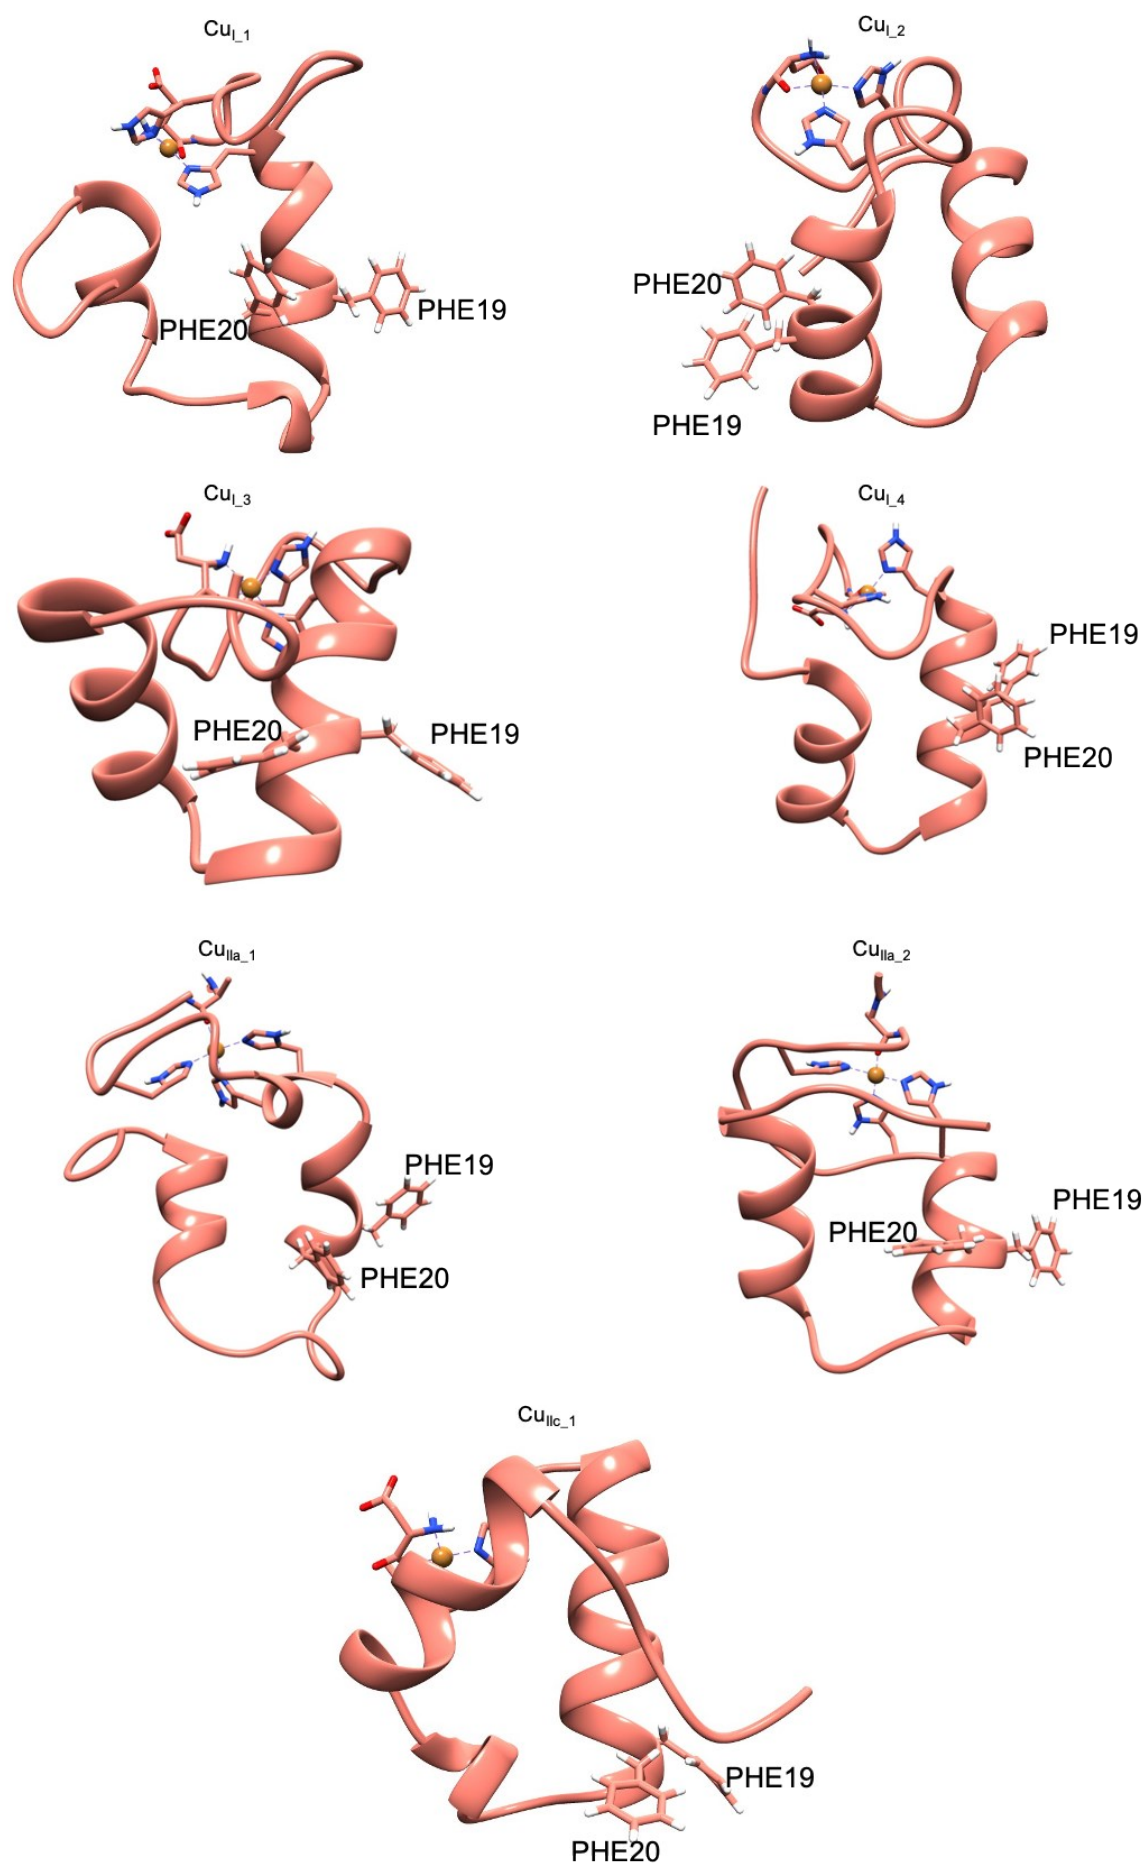

Figure S4.2. Exposure of residues Phe19 and Phe20 in the lowest energy well of Cu(II)-Aβ complexes.

## 5. Computational Information for Docking studies

BioMetAll version 1.0.0 was used for the preliminary metal-binding regions search on the  $\beta$ -amyloid fibril (PDB code: 2MXU). All possible binding areas were found restricting to the already known binding residues ASP, GLU, GLN, HIS, TYR and backbone coordinators, with a cutoff of 1.5 from the backbone. The results were analyzed with the UCSF Chimera Software,<sup>1</sup> identifying the most likely metal-binding zones and the residues involved.

Once the possible binding areas were delimited, the metal coordination was tested with GOLD software<sup>2</sup> with the updated GoldScore scoring functions accounting for metal coordination.<sup>3,4</sup> The protein structures were prepared with Chimera, generating *.mol2* files with the proper protonation state. Metal moieties have been prepared replacing the H<sub>2</sub>O ligands of the optimized aquocomplexes with fictitious hydrogens as reported following the published method.<sup>3,4</sup> An evaluation sphere of 8 Å radius, centered in the BioMetAll found area, was set. The protein side chains flexibility was taken into account including GOLD libraries. All the parameters were set to default, with the genetic algorithm (GA) set to 50 GA runs and a minimum of 100,000 operations.

---

<sup>1</sup> Pettersen, E. F.; Goddard, T. D.; Huang, C. C.; Couch, G. S.; Greenblatt, D. M.; Meng, E. C.; Ferrin, T. E. UCSF Chimera - A Visualization System for Exploratory Research and Analysis. *J. Comput. Chem.* **2004**, *25*, 1605–1612.

<sup>2</sup> Verdonk, M. L.; Cole, J. C.; Hartshorn, M. J.; Murray, C. W.; Taylor, R. D. Improved Protein–Ligand Docking Using GOLD. *Proteins Struct. Funct. Bioinforma.* **2003**, *52*, 609–623.

<sup>3</sup> Sciortino, G.; Rodríguez-Guerra Pedregal, J.; Lledós, A.; Garribba, E.; Maréchal, J.D. Prediction of the interaction of metallic moieties with proteins: An update for protein-ligand docking techniques. *J. Comput. Chem.* **2017**, *39*, 42–51.

<sup>4</sup> Sciortino, G.; Garribba, E.; Maréchal, J.D. Validation and Applications of Protein–Ligand Docking Approaches Improved for Metalloligands with Multiple Vacant Sites. *Inorganic Chemistry*, **2019**, *58*, 294–306.
